# Supplementary material for: How effective are interventions to improve social outcomes among offenders with personality disorder: a systematic review
Source: BMC Psychiatry. 2017 Nov 17;17:368. doi: 10.1186/s12888-017-1536-3 (PMC5693593; doi:10.1186/s12888-017-1536-3)
Supplement: Additional file 1: — Data extraction. Table of all the data extracted from included studies. (XLSX 42 kb) [file 12888_2017_1536_MOESM1_ESM.xlsx]

## Sheet: Sheet1
Reference	Year data collected	Country	Aim/ hypothesis	Study design	Inclusion criteria	Sample demographics	PD/psychopathy identification method	PD/psychopathy prevalence	Offender status	Participation outcome of interest	Intervention	Analysis method	Results	Limitations
Davidson et al. (2009)	Not reported	Two UK sites (England and Scotland)	Compare effect of cognitive behavioural therapy (CBT) to treatment as usual (TAU) on violence, alcohol misuse, mental health and social functioning for violent men with ASPD in a community setting. Test the feasibility of conducting an RCT within this setting.	Feasibility RCT	Males 18 - 65 years ASPD (using SCID-II) Living in the community Positive endorsement of any item on MacArthur Community Violence Screening Instrument (MCVSI) Interview in the 6 months prior to baseline Able to provide written informed consent.	Age in years M(SD): TAU= 36.5 (10.9), CBT= 39.3 (9.9), All= 37.9 (10.4) Gender: Male 100% Ethnicity: Only proportion white reported, TAU 66.7%, CBT 68%, All 67.3%	Structured Clinical Interview for DSM-IV Axis II Personality Disorders (SCID-II)	1	Unclear. First involvement with the law given as mean age. Not reported if all participants were involved with the law.	Social Functioning measured using Social Functioning Questionnaire	Cognitive Behavioural Therapy for BPD and ASPD. Described as: Participants encouraged to engage in treatment through a cognitive formulation of their problems. Therapy focuses on beliefs about self and others and behaviours that impair social and adaptive functioning. Participants randomized to either 15x 1hr sessions over 6 months or 30x 1hr sessions over 12 months	Participants randomized to either CBT or TAU. CBT group randomised to either 15x 1hr sessions over 6 months or 30x 1hr sessions over 12 months. Change on SFQ from baseline to last time of follow up (6 or 12 months) adjusted for baseline levels. Treatment difference and estimate 95% confidence intervals (CIs) estimated from an analysis of covariance of the changes from baseline adjusted for baseli…	No differences in social functioning between CBT and TAU groups at 12 months: Mean difference =-0.7 (95% CI =-3.3 to 1.8), p=0.54. Trend for those who received 6 months of CBT to have improved social functioning compared to TAU (p=0.08, data not shown).	Did not explicitly investigate factors within CBT that may influence social functioning. Small-scale feasibility study, underpowered to detect clinically important differences between groups. TAU is not defined Medium risk of bias
Fortune et al. (2011)	2005-06 Follow up: 2007-08	UK	Follow up patients for 2 years to determine clinical and economic outcomes of non-high secure (medium, community and residential) services for offenders with personality disorder.	Prospective cohort	All service users in three non-high secure forensic services treating adults with PD and IQ above 70	Age in years (M, S.D.) for whole sample (not given for community group) 36.8(8.3) Gender: Male Ethnicity for community group: White 92% Black 8% Ethnicity for whole sample: White 80% Black: 15% Other: 5%	International Personality Disorder Examination (IPDE)	1	All in receipt of forensic mental health services Sample described as personality-disordered offenders. Violent offence 80% Sexual offence 31% Acquisitive offence 74% Drug offence 28%	Social functioning Measured using Work and Social Adjustment Scale	Service described as ‘UK pilot psychiatric services for personality disordered offenders’. Three different non-high secure services (providing inpatient and community service), with stated aims to provide treatments to reduce the risk of re-offending, address mental health needs and improve social functioning The community services: 1. Residential service provided by local housing organisation th…	Paired t-test to detect statistically significant change in social functioning	No significant difference in social functioning at 6 months or 24 months. 29/55 lost to follow up. Initially 24/54 in community group. For the community group: Mean WSAS at baseline =20.42 (12.12), mean at 6 months 19.53(10.97). T=0.81, p=0.43. Mean WSAS at 24 months=14.5(8.3), T=1.04, p=0.33.	Unclear: i) How representative of the population the sample is (refusal 39%) ii) How many patients were followed up in the community group and thus the validity of the findings
Krampen (2009)	Not reported - assessments used indicate it is post 2002	Germany	Follow up patients for 5 years to determine long-term effects of integrative psychotherapy on: criminal and police records, occupational adjustment, social integration, frequency of relaxation exercises used in everyday life	Cohort	Male Dominant symptoms of violence and acting out against intimates Referred/self-referred to psychotherapy for treatment of this	For whole sample (not given for ASPD group) Age in yrs M(SD):34.3 (6.6) Range 25-56 yrs Gender: Male Ethnicity: Not reported	SCID-II	ASPD = 61% at start of treatment Results for ASPD group reported separately	Reports all had history of criminal involvement	Occupational adjustment described as: “Being on the job' for two or more years” Social adjustment not clearly defined, denoted as: "peers’ data about non-deviant social network”	Long-term integrative psychotherapy including progressive relaxation and autogenous training. Four components described: (1) Enhanced social-emotional skills, empathy and morality. Techniques include modelling, operant and respondent techniques, role playing, therapeutic homework, moral dilemma techniques, mirroring, free association, and guided imagery. (2) Reduced psychophysiological arousal in…	Pre-and post frequency counts and percentages	For antisocial personality disorder group: Occupational adjustment Increase from 7-12 (25%-43%) Social adjustment There is no pre-test score. Only post test score of 13 (46%) which the authors report is positive	Statistical measures not used to compare significant change or with other groups within the sample. Small sample, potentially limited representativeness given the majority were not mandated to therapy. Inadequate articulation of social adjustment and attribution of change to factors targeted through treatment. Authors not explicit about how intervention may influence occupational / social adjustm…
Öhlin et al. (2015)	2004 – 2011	Sweden	Evaluate 7-year outcome of buprenorphine assisted treatment with contracted work/education, combined with low tolerance for non-prescribed drug use. Analyse influence of gender, psychiatric disorder on outcome of drug use, social situation and criminal activity	Cohort	Age 20+ At least 1 year documented heroin addiction Not expelled from another program in previous 3 months Contact with social services Current drug-free living environment Employment contract on starting treatment Agree to expulsion if use non-prescribed drugs.	Age: Men: 22–62, M=34.29 Women: 20–52, M=32.23All: 21–62, M=33.76 Gender: Male 77.7% Female 22.3% Ethnicity: Not reported	SCID-II	84% *results not reported separately for PDOs.	73% history of probation 54.1% history of prison 40.5% current probation	Employment - either ‘regular’ job or subsidised wages during studies	Multi-modal treatment with five basic elements: (1) Pharmacological treatment with buprenorphine to manage opioid addiction. (2) Prohibition of misuse of drugs. (3) Access to drug-free accommodation, although no further detail is given. (4) Achieving structured employment (work or studies) (5) Psychosocial treatment sessions to modify drug use and ‘prevent passivity’.	Employment rates pre- and post Statistical comparisons were based on 148 patients who stayed in the program for a minimum of 30 days and started buprenorphine maintenance treatment. Analysis of variance and t-test to compare interval data or data with higher metrical properties. Bivariate regression analysis to investigate possible differences in the study group. Raw score in the tests converted …	69% employed in regular job at 7 years compared to 22% at outset. Proportionally more women than men in work or education (70% vs 60%) 30% improvement for both sexes in movement from precarious work to employment in the regular labour market. Drop outs lost employment soon after and did not resume. 29% earned their living by a subsidized wage compensation compared to 9.5% at baseline. Subsidized …	Assumption made that PDOs were a sufficient proportion to justify inclusion Unclear what specifically was considered the factor that increased employment rate. Statistical significance of change in employment rates not reported. High risk of bias
Whitehead et al. (2007)	Not reported	New Zealand	Demonstrate application of the Good Lives Model to treatment with a high risk, (psychopathic) violent offender	Case study	Not reported	Age: 28 Gender: Male Ethnicity: Maori	Psychopathy Checklist Screening Version (PCL: SV)	100% (psychopathy)	Parole following incarceration for ‘most of adult life’	A ‘good life’ including activities, experiences, or situations sought for their own sake and that benefit individuals by increasing fulfilment and happiness In this case: attending college, learning to drive, sustaining an intimate relationship, and being a family member.	Exploratory – Describes treatment using GLM reported in five phases 1) Identifying life goals and the motivation for pursuing them. 2) Defining desired identity and determining the barriers/opportunities to achieving this. 3) Producing a good lives informed formulation. 4) Developing a plan to equip offender with values, attitudes, skills and resources to achieve their goals in a prosocial way. 5…	Psychological formulation	Authors frame intervention as a success. Participant commenced but did not complete college or diving qualification, started learning to drive but completion not reported. Identify that transport difficulties impacted success at college They suggest self-belief was essential to achieving these outcomes. Participant reported to be in an intimate relationship and have had success in establishing a …	Single case deliberately selected to demonstrate utility of GLM. High risk of bias
